# Supplementary material for: Synthesis and improved photoelectrochemical performances of oxygen-deficient TiO2/black-BaTiO3/CdS multiple-heterojunction nanoarrays
Source: Royal Society of Chemistry journal article supplement (doi:10.1039/d3cy01665j), 2024-01-01
Supplement: d3cy01665j1.pdf [file d3cy01665j1.pdf]

## **Synthesis and improved photoelectrochemical performances of TiO<sub>2</sub>/Black-BaTiO<sub>3</sub>/CdS multiple-heterojunction nanoarrays**

**Ganghua Zhang,<sup>\*,a</sup> Zhibo Chen,<sup>a</sup> Xiao Li,<sup>a</sup> Zhanqiang Liu,<sup>b</sup> Huichen Guo,<sup>a</sup>  
Yanwei Huang,<sup>a</sup> Yongzheng Fang<sup>\*,a</sup> and Jingshan Hou<sup>\*,a</sup>**

*<sup>a</sup>School of Materials Science and Engineering, Shanghai Institute of Technology,  
Shanghai 201418, P. R. China;*

*<sup>b</sup>Department of Materials Chemistry, Huzhou University, 759 East Erhuan Road,  
Huzhou, 313000, P. R. China.*

**E-mail addresses:** ganghuazhang@sit.edu.cn (G.H. Zhang); fyz1003@sina.com (Y.Z. Fang) and houjingshan@hotmail.com (J.S. Hou)

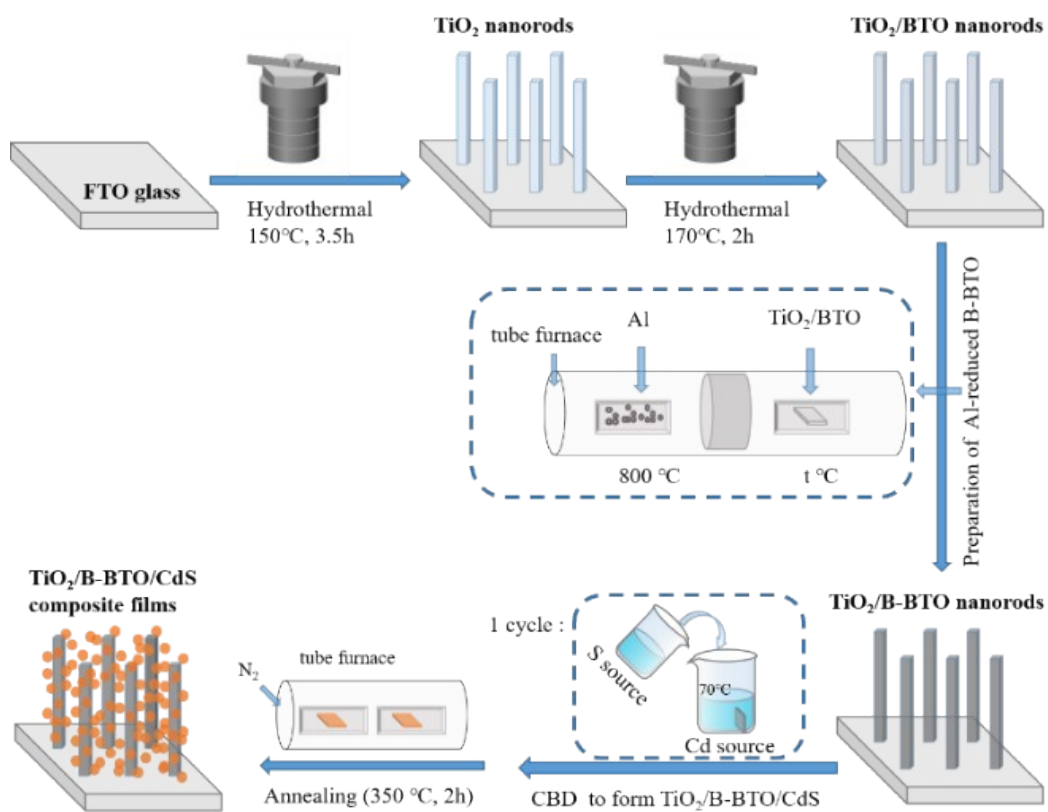

**Fig. S1.** Schematic synthesis process of  $\text{TiO}_2/\text{B-BTO}/\text{CdS}$  composite films.

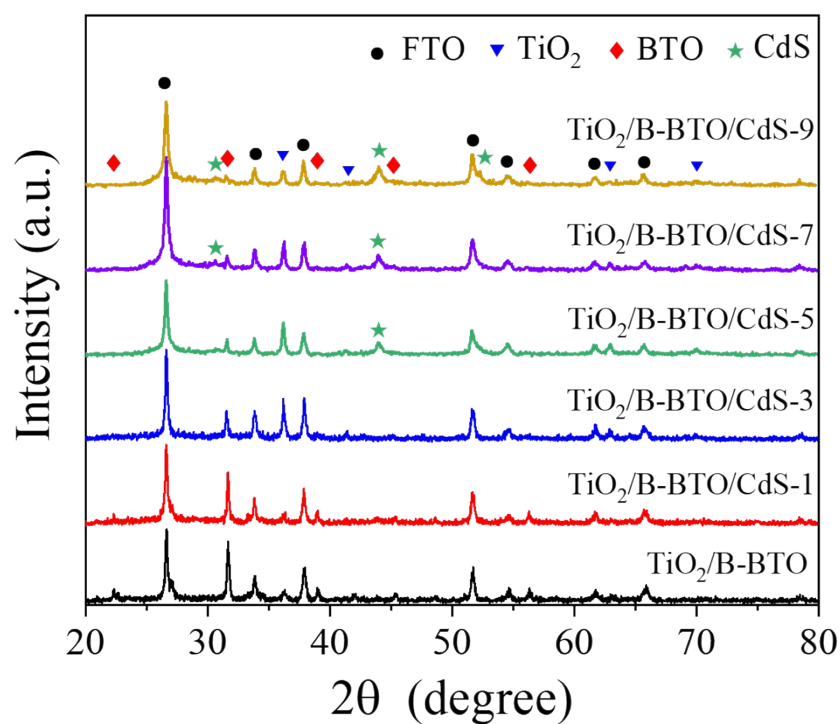

**Fig. S2.** XRD plots of TiO<sub>2</sub>/B-BTO and TiO<sub>2</sub>/B-BTO/CdS film samples with different deposition times for CdS layer.

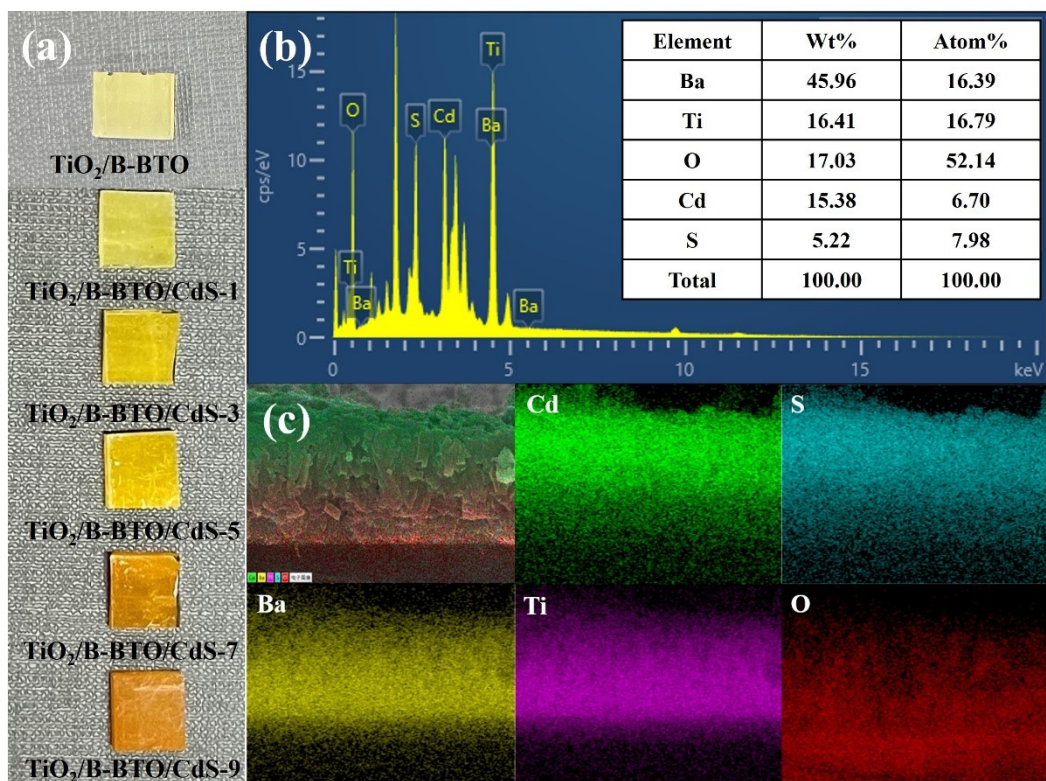

**Fig. S3.** (a) Optical photographs of TiO<sub>2</sub>/B-BTO/CdS composite films with different deposition times for CdS layer. (b) EDS results and (c) elemental mapping images of TiO<sub>2</sub>/B-BTO/CdS composite film.

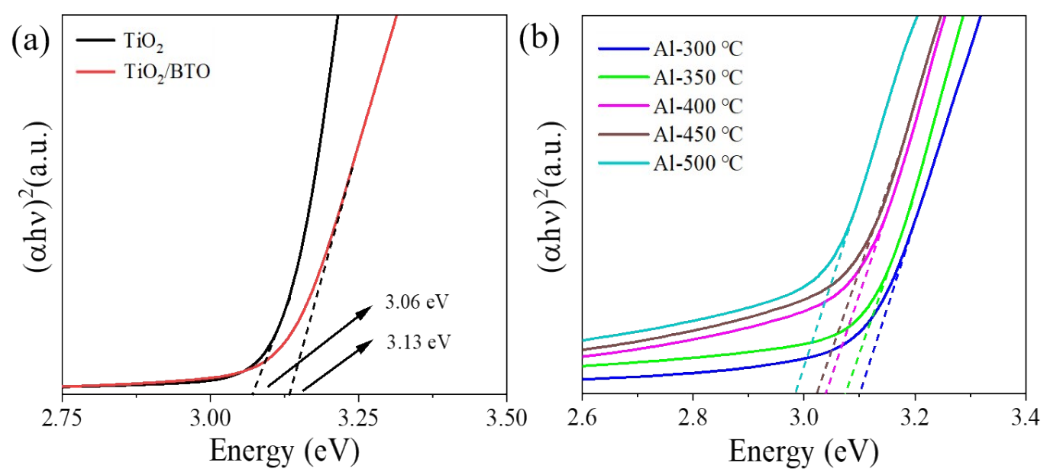

**Fig. S4.** The optical bandgaps of  $\text{TiO}_2$ ,  $\text{TiO}_2/\text{BTO}$  (a) and  $\text{TiO}_2/\text{B-BTO}$  (b) film samples.

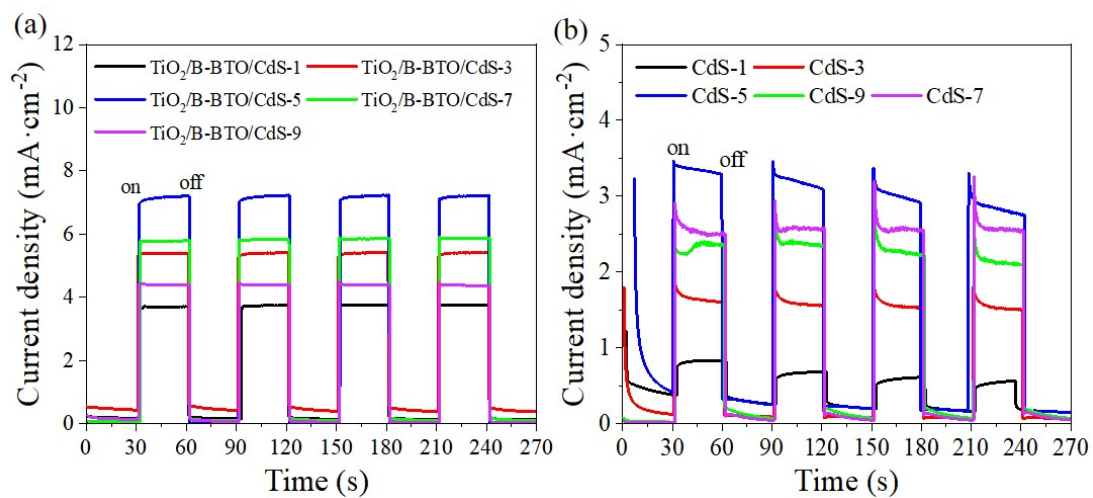

**Fig. S5.** Photocurrent densities of TiO<sub>2</sub>/B-BTO/CdS (a) and CdS (b) photoelectrodes with different deposition times for CdS layer.

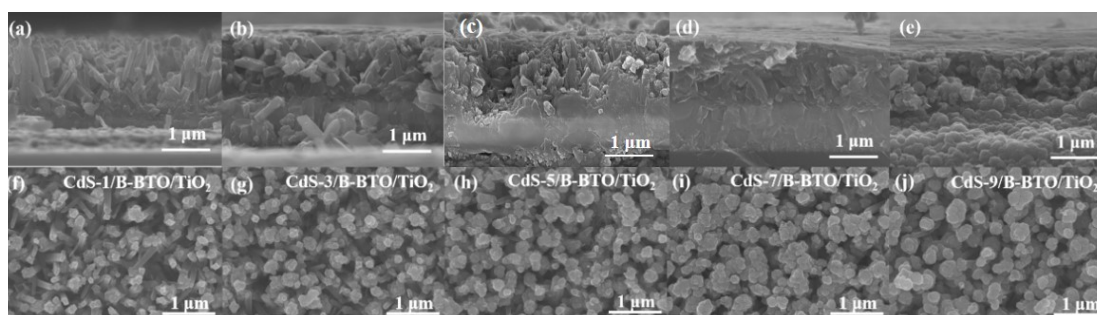

**Fig. S6.** SEM images of cross-section (a-e) and corresponding surface (f-j) diagram of TiO<sub>2</sub>/B-BTO/CdS film samples with different deposition times for CdS layer.

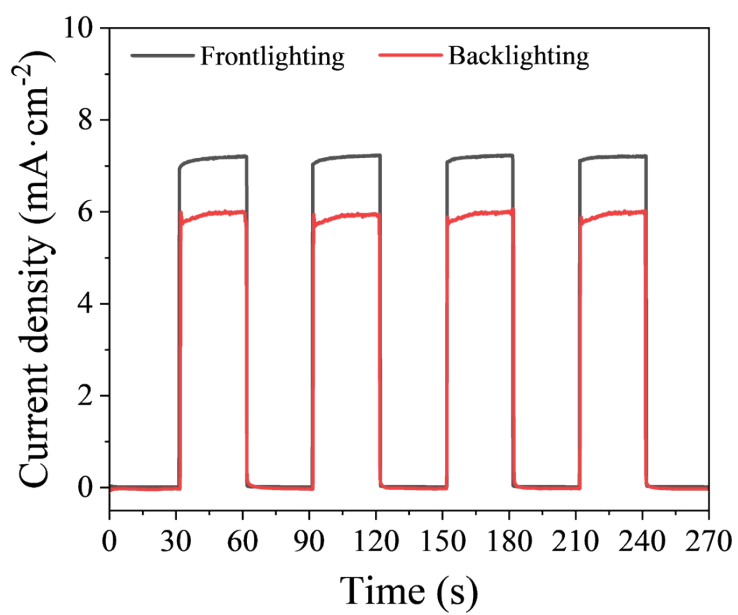

**Fig. S7.** Photocurrent density of TiO<sub>2</sub>/B-BTO/CdS-5 samples under frontside and backside illumination.

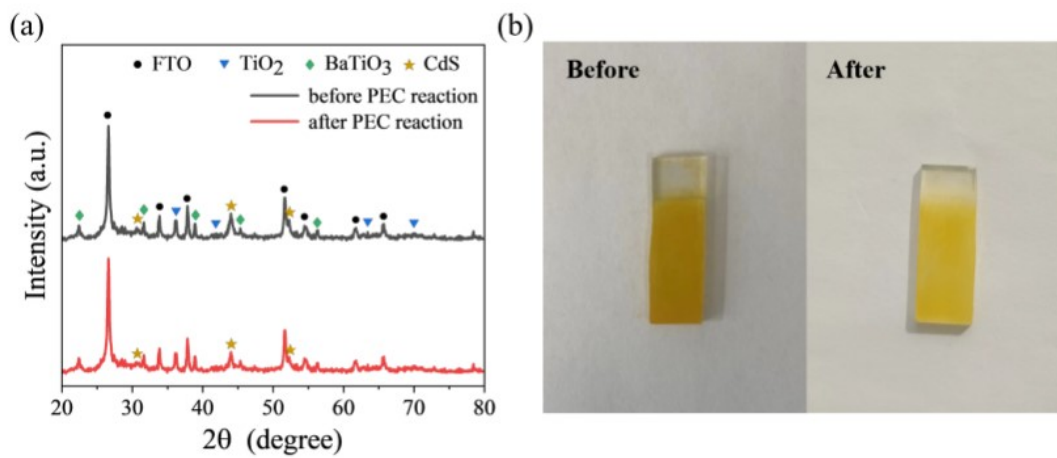

**Fig. S8.** The XRD patterns (a) and optical photographs (b) of TiO<sub>2</sub>/B-BTO/CdS composite films before and after PEC reactions.



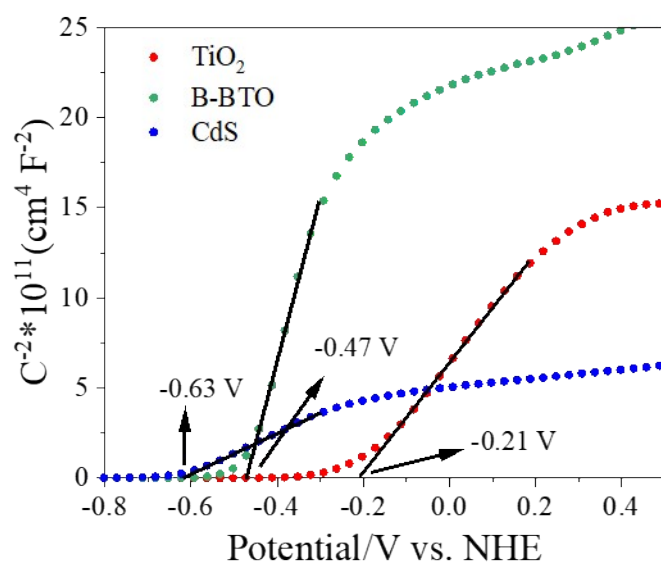

**Fig. S9.** The Mott-Schottky plots of  $\text{TiO}_2$ , B-BTO and CdS film samples.

**Table S1.** PEC performance comparison of recent reports from literatures.

| Materials                                                     | Photocurrent density (mA cm <sup>-2</sup> ) | Potential (V vs. RHE) | refs      |
|---------------------------------------------------------------|---------------------------------------------|-----------------------|-----------|
| TiO <sub>2</sub> TASNTPC                                      | 1.1                                         | 1.22                  | [1]       |
| TiO <sub>2</sub> NTAs                                         | 0.73                                        | 1.23                  | [2]       |
| BaTiO <sub>3-x</sub> -5%                                      | 0.77                                        | 1.23                  | [3]       |
| BaTiO <sub>3</sub>                                            | 0.35                                        | 1.23                  | [3]       |
| BaTiO <sub>3</sub> /CdS                                       | 0.5                                         | 0.96                  | [4]       |
| BaTiO <sub>3</sub> /BaTiO <sub>3-x</sub> /CdS                 | 0.1                                         | 0.96                  | [5]       |
| BaTiO <sub>3</sub> @ $\alpha$ -Fe <sub>2</sub> O <sub>3</sub> | 0.37                                        | 0.96                  | [6]       |
| H:TiO <sub>2</sub>                                            | 1.97                                        | 0.4                   | [7]       |
| TiO <sub>2</sub> /BTO NW                                      | 1.3                                         | 1.23                  | [8]       |
| TiO <sub>2</sub> -SrTiO <sub>3</sub> NWs                      | 1.43                                        | 1.23                  | [9]       |
| TiO <sub>2</sub> /BTO/Ag <sub>2</sub> O                       | 1.8                                         | 1.8                   | [10]      |
| TiO <sub>2</sub> /B-BTO/CdS                                   | 7.14                                        | 0.96                  | this work |

## References

- [1] K. Liu, G. Wang, M. Meng, S. Chen, J. Li, X. Sun, H. Yuan, L. Sun and N. Qin, TiO<sub>2</sub> nanotube photonic crystal fabricated by two-step anodization method for enhanced photoelectrochemical water splitting, *Mater. Lett.*, 2017, **207**, 96-99.
- [2] Q. Kang, J. Cao, Y. Zhang, L. Liu, H. Xu and J. Ye, Reduced TiO<sub>2</sub> nanotube arrays for photoelectrochemical water splitting, *J. Mater. Chem. A*, 2013, **1**, 5766-5774.
- [3] Z. Qiao, C. Wang, Y. Zou, X. Wu and Z. Liu, Oxygen vacancy and pyroelectric polarization collaboratively enhancing PEC performance in BaTiO<sub>3</sub> photoelectrodes, *Colloids Surf., A*, 2022, **647**, 129073.
- [4] T. Fang, H. Hu, J. Liu, M. Jiang, S. Zhou, J. Fu, W. Wang and Y. Yang, Type-II Band Alignment Enhances Unassisted Photoelectrochemical Water-Splitting Performance of the BaTiO<sub>3</sub>/CdS Ferroelectric Heterostructure Photoanode under Solar Light Irradiation, *J. Phys. Chem. C*, 2021, **125**, 18734-18742.
- [5] M. J. Zhu, G. H. Zhang, L. N. Zhai, J. W. Cao, S. S. Li and T. Zeng, Polarization-enhanced photoelectrochemical properties of BaTiO<sub>3</sub>/BaTiO<sub>3-x</sub>/CdS heterostructure nanocubes, *Dalton Trans.*, 2021, **50**, 3137-3144.
- [6] C. Li, S. Fu, H. Han, W. Wang, J. Fu, H. Shi, Y. Liang, Y. Jia and M. Zhu, Synthesis and SPEF-induced enhanced photoelectrochemical performance of the BaTiO<sub>3</sub>@ $\alpha$ -Fe<sub>2</sub>O<sub>3</sub> ferroelectric heterojunction, *J. Phys. Chem. C*, 2019, **123**, 22431-22438.
- [7] G. Wang, H. Wang, Y. Ling, Y. Tang, X. Yang, R. Fitzmorris, C. Wang, J. Zhang and Y. Li, Hydrogen-treated TiO<sub>2</sub> nanowire arrays for photoelectrochemical water splitting, *Nano Lett.*, 2011,

**11**, 3026-3033.

[8] W. Yang, Y. Yu, M. B. Starr, X. Yin, Z. Li, A. Kvit, S. Wang, P. Zhao and X. Wang, Ferroelectric polarization-enhanced photoelectrochemical water splitting in TiO<sub>2</sub>-BaTiO<sub>3</sub> core-shell nanowire photoanodes, *Nano Lett.*, 2015, **15**, 7574-7580.

[9] F. Wu, Y. Yu, H. Yang, L. N. German, Z. Li, J. Chen, W. Yang, L. Huang, W. Shi, L. Wang and X. D. Wang, Simultaneous enhancement of charge separation and hole transportation in a TiO<sub>2</sub>-SrTiO<sub>3</sub> core-shell nanowire photoelectrochemical system, *Adv. Mater.*, 2017, **29**, 1701432.

[10] Z. Liu, L. Wang, X. Yu, J. Zhang, R. Yang, X. Zhang, Y. Ji, M. Wu, L. Deng, L. Li and Z. L. Wang, Piezoelectric-effect-enhanced full-spectrum photoelectrocatalysis in p-n heterojunction, *Adv. Funct. Mater.*, 2019, **29**, 1807279.
